1 **Endpoint PCR coupled with capillary electrophoresis**  
2 **(celPCR) provides sensitive and quantitative measures of**  
3 **environmental DNA in singleplex and multiplex reactions**

4  
5 **Bettina Thalinger<sup>1,2</sup>, Yannick Pütz<sup>2</sup> & Michael Traugott<sup>2,3</sup>**

6  
7 <sup>1</sup> Centre for Biodiversity Genomics, University of Guelph, 50 Stone Road E, N1G 2W1, Guelph,  
8 Ontario, Canada

9 <sup>2</sup> Department of Zoology, University of Innsbruck, Technikerstr. 25, 6020, Innsbruck, Austria

10 <sup>3</sup> Sinsoma GmbH, Lannes 6, 6176 Voels, Austria

11

12

13 **\*Corresponding author:**

14 Bettina Thalinger, [bettina.thalinger@gmail.com](mailto:bettina.thalinger@gmail.com)

15 Centre for Biodiversity Genomics, University of Guelph, 50 Stone Road E, N1G 2W1, Guelph,  
16 Ontario, Canada

17

18 **Keywords:** species-specific amplification, multiplex PCR, singleplex PCR, capillary

19 electrophoresis, environmental DNA

20 **Abstract**

21 The use of sensitive methods is key for the detection of target taxa, from trace amounts of  
22 environmental DNA (eDNA) in a sample. In this context, digital PCR (dPCR) enables direct  
23 quantification and is commonly perceived as more sensitive than endpoint PCR. However,  
24 endpoint PCR coupled with capillary electrophoresis (cePCR) potentially embodies a viable  
25 alternative as it quantitatively measures signal strength in Relative Fluorescence Units (RFU).  
26 Provided comparable levels of sensitivity are reached, cePCR permits the development of cost-  
27 efficient multiplex PCRs, enabling the simultaneous detection of several target taxa.

28 Here, we compared the sensitivity of singleplex and multiplex cePCR to dPCR for  
29 species-specific primer pairs amplifying mitochondrial DNA (COI) of fish species occurring in  
30 European freshwaters by analysing dilution series of DNA extracts and field-collected water  
31 samples. Both singleplex and multiplex cePCR and dPCR displayed comparable sensitivity with  
32 reliable positive amplifications starting at two to 10 target DNA copies per  $\mu\text{l}$  DNA extract.  
33 cePCR was suitable for quantifying target DNA and direct inference of DNA concentrations  
34 from RFU was possible after accounting for primer effects. Furthermore, multiplex cePCRs and  
35 dPCRs were successfully used for the detection and quantification of fish-eDNA in field-  
36 collected water samples, confirming the results of the dilution series experiment and  
37 exemplifying the high sensitivity of the two approaches.

38 The possibility of detection and quantification via multiplex cePCR is appealing for the  
39 cost-efficient screening of high sample numbers. The present results confirm the sensitivity of  
40 this approach thus enabling its application for future eDNA-based monitoring efforts.

## 41 **Introduction**

42 DNA traces contained in environmental samples are frequently used for the detection of species  
43 in environmental studies and wildlife biology [1]. Recently, species detection from water  
44 samples using environmental DNA (eDNA) - DNA fragments released in the form of excretions,  
45 secretions, and other bits of organisms into the environment [2] - has also moved from a purely  
46 scientific method to the successful application in routine species monitoring [3–7]. This creates  
47 a need for cost-efficient and reliable processing of large sample numbers.

48 Studies investigating the general species composition in environmental samples usually  
49 employ metabarcoding [6,8,9]. Individual species and their distribution are mainly investigated  
50 via targeted eDNA assays using endpoint PCR, quantitative real-time PCR (qPCR), or digital  
51 PCR (dPCR) [10–12]. For the amplification of eDNA, qPCRs and dPCRs are frequently  
52 complemented with probes to increase target-specific amplification. In addition, both techniques  
53 allow the quantification of target DNA [11,13]. Nevertheless, qPCR is an indirect approach as  
54 DNA quantities are calculated using standard curves and only dPCR enables direct and  
55 absolute DNA quantification [14]. Endpoint PCR is also commonly used to detect target DNA  
56 from environmental samples. Although the visualisation of amplification success on agarose  
57 gels and the resulting binary (yes/no) data can be used for occupancy modelling [15,16], it does  
58 not generally allow for quantitative estimates. This disadvantage can be compensated by  
59 analysing the endpoint PCR product via capillary electrophoresis (celPCR): in capillary  
60 electrophoresis all double-stranded DNA fragments are separated by their size and the amount  
61 of each fragment is quantified in a relative manner by measuring the Relative Fluorescence  
62 Units (RFU) of each fragment. This is possible as either the primers or the whole fragment is  
63 fluorescently labelled [17,18]. In the past, celPCR has been used to determine if the  
64 fluorescence of a target amplicon exceeds a predefined threshold and samples can thus be  
65 scored “positive” [19,20]. However, there has been only rudimentary attempts to assess the  
66 general quantification capabilities of celPCR for eDNA analyses [18,21]. This possibility for

67 quantification is especially appealing for target eDNA detection in a large number of samples, as  
68 there is a high potential for cost-reduction based on PCR-chemicals alone (Table 1).

69 Target DNA concentrations in environmental samples are usually low and therefore, the  
70 performance of both amplification and visualization methods at minute concentrations is crucial  
71 for the successful detection of target eDNA [22]. To compare the sensitivity of assays, the Limit  
72 of Detection (LOD) is commonly used, however, its definition differs between PCR platforms:  
73 For qPCR, it is frequently defined as the target DNA concentration at which 95% of the  
74 reactions yield a positive result [23,24]. Theoretically, dPCR requires three out of 3,000 droplets  
75 to be positive, albeit the detection of single molecules is considered viable [25]. In practice, the  
76 LOD was found to be below 0.5 copies per  $\mu\text{l}$  in the dPCR mix [22,26]. In celPCR, the objective  
77 quantification of the fluorescence signal enables the definition of an LOD, which so far was  
78 defined as the amount of target DNA copies from which a reliable positive amplification (i.e.  
79 three or more positive replicates) is possible [17,27]. Endpoint PCR is sometimes associated  
80 with reduced sensitivity in comparison to qPCR and dPCR [28,29]. However, the LODs  
81 determined for invertebrate and vertebrate DNA with celPCR (10 to 30 target DNA copies in the  
82 reaction [17,18,27]) are similar to qPCR LODs ranging from five to 50 copies in PCR [28,30,31].  
83 celPCR can therefore be considered sufficiently sensitive for detecting minute eDNA quantities.

84 Another aspect of targeted DNA amplification, which is hardly used in combination with  
85 eDNA detection, is multiplexing, i.e. the amplification of more than one target DNA fragment via  
86 the simultaneous use of several taxon-specific primer pairs [17,32]. Independent of the PCR  
87 platform and primer specificity, multiplex PCRs need to be balanced to exhibit similar levels of  
88 sensitivity for each of the primer pairs used [17,33]. This can be achieved by designing primers  
89 with similar melting temperature while minimizing cross-reactivity and competition among them  
90 [17,34]. It is possible to adjust the concentration of specific primers or probes in PCR to  
91 counteract such effects [17]. In celPCR, multiplexing is accomplished by combining primer pairs  
92 yielding amplicons of different size [17,32]. However, such balanced multiplex celPCR assays

93 [27] were so far not examined for any remaining effects of primer identity after the optimization  
94 process (e.g. via direct comparison with dPCR results). Multiplex celPCR has been employed  
95 for the efficient screening of large sample sets to study trophic interactions [20,35], but not yet  
96 for eDNA studies. Albeit distinction via fragment length differences is also possible for qPCR  
97 and dPCR [36,37], multiplexes on these instruments frequently employ specific dyes (attached  
98 to the respective probes) for each target [34,37]. The limited number of available dyes and their  
99 potential influence on primer/probe properties in addition to of all the above mentioned factors  
100 [17,38], make the development of endpoint PCR / celPCR multiplexes more feasible in  
101 comparison to qPCR and dPCR (but see [39] for a high-throughput qPCR approach). Generally,  
102 the use of multiplex PCRs enhances the cost- and time-effectiveness of any screening for  
103 specific target taxa [17,27,34], but there has been no in-depth assessment whether this is  
104 possible without forfeiting sensitivity and whether it is truly beneficial compared to singleplex  
105 endpoint PCRs, qPCRs, and dPCRs, which are most commonly applied for the detection of  
106 individual taxa from environmental samples.

107 We designed species-specific primers for the mitochondrial cytochrome *c* oxidase  
108 subunit I (COI) gene of seven freshwater fish species occurring in Central Europe and optimized  
109 amplification conditions for singleplex celPCR, dPCR, and two multiplex celPCRs. The  
110 sensitivity was compared between the three approaches via a dilution series experiment, which  
111 also evaluated the potential to quantify target eDNA from celPCR results. Finally, field-collected  
112 water samples were analyzed with multiplex celPCR and dPCR with the aim of estimating target  
113 eDNA copy number. We hypothesize that H1) it is possible to estimate target DNA copy number  
114 from RFU obtained by celPCR, H2) primer identity affects PCR efficiency even if primer  
115 characteristics are chosen for maximum similarity between primer pairs, and H3) both singleplex  
116 and multiplex celPCR show sufficient sensitivity to detect and quantify eDNA of all target  
117 species in field samples.

118

119

## 120 **Materials and Methods**

121 All laboratory work was carried out in a clean-room laboratory at the University of Innsbruck,  
122 equipped with an ultraclean overpressure air system, separate rooms for DNA extraction, PCR  
123 preparation, PCR execution and post-PCR work, always using laminar flow workbenches, DNA-  
124 free gloves and protective clothing. All surfaces were cleaned with 10% bleach and 70% ethanol  
125 prior to laboratory work and all workbenches were daily radiated with UVC-light for three hours.

126

### 127 *Primer design and PCR optimization*

128 Species-specific primers were designed for seven fish species commonly occurring in rhithral  
129 freshwaters in Central Europe, namely *Cottus gobio*, *Oncorhynchus mykiss*,  
130 *Salvelinus fontinalis*, *Salvelinus umbla*, *Salmo trutta*, *Squalius cephalus*, and  
131 *Thymallus thymallus*. For this task, a custom reference sequence database containing the COI  
132 sequences of all Central European freshwater fish species was used [27]. Suitable priming  
133 regions were identified using BioEdit Version 7.3.5 [40] before using Primer Premier 5  
134 (PREMIER Biosoft International) to design species-specific primer pairs with melting  
135 temperatures as close as possible to 60 °C, amplicon lengths between 89 and 226 bp, and  
136 minimizing potential formation of dimers and secondary structures. After initial singleplex PCR  
137 testing, primer pairs were arranged in two multiplex PCR assays with at least 20 bp length  
138 difference between amplicons, enabling target identification based on amplicon length in  
139 capillary electrophoresis. Multiplex PCR conditions were optimized and primer concentrations  
140 adjusted to obtain similar sensitivity and amplification efficiency across all primer pairs using  
141 standardized DNA templates [17,18,27]. The final singleplex and multiplex PCRs underwent  
142 specificity testing using muscle tissue extracts from Central European fish species focusing on  
143 the seven target fish species, closely related species, and species with only a small number of  
144 mismatches at the respective priming sites. Two to three extracts were used per species (see

145 SI1 for an alignment of target species, non-target species, and primers). Primers were found to  
146 be species-specific and no non-target amplification occurred with the below reported PCR  
147 conditions.

148 Both singleplex and multiplex endpoint PCR assays were based on the Multiplex PCR  
149 Kit (Qiagen) and contained bovine serum albumin (BSA) and tetramethylammonium chloride  
150 (TMAC) to reduce inhibition and enhance specificity [41,42]. Each 10 µl reaction contained  
151 1 x reaction mix, 5 µg BSA, 30 mM TMAC, the respective primer combinations (Table 2) and  
152 3.2 µl extract. For the dilution series experiment, the master mix was altered by using only 1 µl  
153 extract (or its respective dilution) and adding 2.2 µl molecular grade water. The thermocycling  
154 conditions with optimum sensitivity and specificity on a Mastercycler® nexus (Eppendorf) were  
155 15 min at 95 °C, 35 cycles of 94 °C for 30 s, 65 °C for 3 min and 72 °C for 60 s and final  
156 elongation at 72 °C for 10 min. For amplicon separation and visualization after endpoint PCR,  
157 the capillary electrophoresis system QIAxcel Advanced and the software QIAxcel ScreenGel  
158 (version 1.4.0, Qiagen) with the method AM320 and 30 s injection time were used. If PCR  
159 products of the expected fragment length reached a signal strength  $\geq 0.08$  RFU, they were  
160 deemed positive and their RFUs were recorded. The singleplex and multiplex ceIPCRs were run  
161 in 96-well plates and contained at least two negative and two positive controls (approx. 100  
162 target DNA copies per target species and reaction). All negative controls resulted negative; all  
163 positive controls delivered the expected target amplicon(s). Albeit the *Salvelinus umbla* primer  
164 pair was included in one of the optimized multiplex reactions, it was not used in any of the  
165 consecutive processes (i.e. optimization on the dPCR platform, dilution series experiment) and  
166 the species was never detected in field-collected samples.

167 In a next step, the primer pairs (Table 2; exception: *S. umbla*) were used to create  
168 EvaGreen-based droplet dPCR assays using the AutoDG (Bio-Rad) for droplet generation, a  
169 Mastercycler® nexus for DNA amplification, and the QX200 Droplet Reader with its  
170 corresponding software QuantaSoft 1.0.596. (Bio-Rad) for fluorescence detection. We optimized

171 PCR conditions by adjusting annealing temperature and/or time, and by using three-step  
172 protocols with separated annealing and extension phases to obtain a clear separation of  
173 positive and negative droplets and minimum “rain” (i.e. droplets with intermittent fluorescence  
174 between positive and negative droplets). Subsequently, a non-target test was conducted using  
175 the respectively other species and the three Central European fish species with the least  
176 sequence divergence at the priming sites. Ultimately, each 22 µl reaction mix, of which approx.  
177 20 µl were used in the droplet generation process, contained 1 × EvaGreen Supermix (Bio-Rad)  
178 and 113.6 nM of each primer (Table 2) leaving 10.5 µl reaction volume, which was filled with  
179 8.3 µl molecular grade water and 2.2 µl extract in the dilution series experiment, and varying  
180 extract volumes for the testing of field-collected samples. The optimum dPCR thermocycling  
181 conditions were 95 °C for 15 min, 40 cycles of 95 °C for 30 s, 58 °C (*O. mykiss* and  
182 *S. fontinalis*), or 60 °C (*S. trutta* and *S. cephalus*), or 62 °C (*T. thymallus*), or 64 °C (*C. gobio*)  
183 for 60 s, and 72 °C for 60 s, followed by stabilization at 4 °C for 5 min, 90 °C for 5 min, and  
184 12 °C until further processing on the droplet reader. It was necessary to manually set a  
185 threshold for positive droplets for each target species, as the fluorescence levels varied with the  
186 fragment length generated by the respective primer pair. For *C. gobio* the threshold was set at  
187 20,200 amplitude, for *O. mykiss* at 13,100, for *S. fontinalis* at 15,000, for *S. trutta* at 16,100, for  
188 *S. cephalus* at 18,300 and for *T. thymallus* at 18,400. All samples were processed in 96-well  
189 plates along with at least two positive and two negative controls, all of which resulted positive or  
190 negative, as expected.

191

#### 192 *Dilution series experiment*

193 The template DNA concentration of one extract from each of *C. gobio*, *O. mykiss*, *S. fontinalis*,  
194 *S. trutta*, *S. cephalus*, and *T. thymallus* was measured three times with the respective dPCR  
195 conditions described above. Based on these results, the extracts were diluted to 5,000 target  
196 DNA copies per µl extract using 1 × TE buffer. From there, a defined dilution series with 21



197 dilution steps (5,000; 4,000; 3,000; 2,000; 1,500; 1,000; 750; 500; 400; 300; 200; 150; 100; 80;  
198 60; 40; 30; 20; 10; 5; 1 copy per  $\mu\text{l}$ ) was generated. Each of the dilutions was used nine times:  
199 for three replicates of singleplex celPCR, multiplex celPCR, and dPCR under the conditions  
200 described above. For each species, the PCRs and the visualization of the obtained results were  
201 carried out right after setting up the dilution series. Cooling racks were used for each dilution  
202 and PCR preparation; diluted extracts were not frozen during processing. Throughout the  
203 experiment, each dPCR reaction produced more than 15,600 droplets (total) and the resulting  
204 concentrations were converted into target copies per  $\mu\text{l}$  for the respective dilution of the extract.

205

#### 206 *Field samples*

207 Per target species, 26 to 29 water samples, which were filtered and extracted as part of a larger  
208 field study (in prep.) were analyzed. For each sample, 2 L of water from different rivers in Tyrol  
209 (Austria) were collected in DNA-free wide-neck bottles and filtered in the field through 47 mm  
210 glass fibre filters with 1.2  $\mu\text{m}$  mesh width (Whatman GF/C) using a peristaltic pump (Solinst,  
211 Model 410). Filters were transported in cooling boxes to the University of Innsbruck and stored  
212 at -20 °C until further processing. Cell lysis and DNA extraction were carried out as described by  
213 Thalinger et al. [18]: the filters were incubated overnight in lysis buffer before separating the  
214 extracts from the filters by centrifugation and extracting the DNA using the Biosprint 96 robotic  
215 platform (Qiagen).

216 All field samples were analyzed using the two multiplex PCR assays (Table 2) and  
217 capillary electrophoresis. For each of the species, 25 samples testing positive and five samples  
218 testing negative in multiplex celPCR were selected and analyzed with dPCR using the optimized  
219 conditions described above. To avoid background fluorescence from non-target DNA contained  
220 in the field sample extracts, 2.63  $\mu\text{l}$  of extract was used per dPCR reaction for samples with  
221 RFUs above 0.5, 5.25  $\mu\text{l}$  were used for samples with RFUs between 0.21 and 0.5, and 10.5  $\mu\text{l}$   
222 of extract was analyzed in case of RFUs between 0.08 and 0.2 to ensure a positive amplification

223 despite very low target DNA concentration. As background fluorescence varied between  
224 samples from different locations, it was necessary to manually adjust the fluorescence threshold  
225 for positive droplets, albeit the positive and negative droplet clouds were clearly distinguishable  
226 for all samples.

227

228 Statistical analysis

229 All calculations and visualizations were made in R Version 4.0.2 [43] using the packages  
230 “ggplot2”[44], “ggpubr”[45], “outliers”[46], “lme4”[47], “nlme”[48], and “MuMIn”[49] .

231 First, the obtained RFUs and copy numbers from the singleplex ceIPCR, multiplex  
232 ceIPCR and dPCR were plotted against the expected copy numbers of the dilution series. Limits  
233 of Detection (LODs, i.e. the lowest number of target copies for which positive amplifications  
234 occurred; inferred from triplicate dPCR measurement of the same extract dilution) and Limits of  
235 Quantification (LOQs, i.e. all three replicates lead to a positive amplification) were evaluated for  
236 singleplex and multiplex ceIPCRs following Agersnap et al. [50] as it was not possible to directly  
237 transfer the LOD definition recently established by Klymus et al. [23] to this experiment. Prior to  
238 any other analyses, Grubbs' tests were performed to remove outliers from the triplicate  
239 measurements [51]. Additionally, the lowest dilution was removed from the dataset, as not all  
240 replicates tested positive on all PCR platforms. Per dilution step and PCR method, the means  
241 and standard deviations of RFU and copies per  $\mu\text{l}$  extract were calculated. Based on these  
242 means, PCR efficiency was compared between RFU obtained from singleplex and multiplex  
243 ceIPCR using linear models. Then, the relationship between RFU and copies per  $\mu\text{l}$  extract was  
244 evaluated using linear mixed effects models. The natural logarithm of mean copies per  $\mu\text{l}$  extract  
245 was entered as independent variable, while mean RFUs derived from either singleplex or  
246 multiplex ceIPCR were entered as fixed effect, and fish species as random effect (random slope  
247 and intercept). As a next step, the models were used to predict copy number per  $\mu\text{l}$  from  
248 individual signal strengths for both singleplex and multiplex PCR results. Observed and

249 predicted copy numbers were plotted against each other and for each species, a linear model  
250 and its 95% Confidence intervals (CI) were calculated. These models were compared to a 45 °-  
251 line representing the expected relation between observed and fitted copy numbers. Finally,  
252 linear models describing the relationship between *ln*-transformed copies and RFU in field  
253 samples were calculated, and observed and predicted copy numbers were plotted together with  
254 data obtained from the dilution series experiment.

255

256

## 257 **Results**

258 In the dilution series experiment, the target DNA concentration per  $\mu$ l extract was quantified via  
259 dPCR for each of the six target species from a maximum of 23,680 copies to a minimum of 0.6  
260 copies. Diluted extracts tested positive for all species with both singleplex and multiplex  
261 celPCRs, with RFU ranging from 0.09 to 6.53 in singleplex celPCR and 0.09 to 6.48 in multiplex  
262 celPCR, respectively. RFU showed an exponential decline with increasing dilution, and  
263 generally higher levels of variability (especially at higher DNA concentrations) compared to  
264 dPCR (Fig. 1).

265         Amplification efficiency differed significantly between singleplex and multiplex celPCRs  
266 for *S. cephalus*, *S. fontinalis*, and *T. thymallus*, with multiplex reactions leading to higher signal  
267 strengths at low DNA concentrations and singleplex reactions resulting in elevated RFU at high  
268 DNA concentrations (Fig. 2, SI2a). This trend was not observed for the three other species. The  
269 comparison of RFU (singleplex or multiplex celPCR) to copy number per  $\mu$ l extract obtained  
270 from dPCR showed amplification differences between primer pairs in endpoint PCR (Fig. 3a).  
271 After accounting for primer pair identity, *ln*-transformed copy number per  $\mu$ l extract could be  
272 predicted from singleplex and multiplex RFU ( $R^2 = 0.96$  for both linear mixed effects models;  
273 Table 3, Fig. 3b). In both the singleplex and the multiplex celPCRs, the RFU produced by  
274 *C. gobio*, *T. thymallus* and *S. cephalus* primers were above the population mean (Fig. 3).

275           The use of individually measured RFU to predicted copy numbers from the linear mixed  
276 effects models showed similar trends for both singleplex and multiplex celPCRs: at low target  
277 DNA levels, predicted copy numbers were higher than the originally measured copy numbers,  
278 which is visualized by the linear regression line and its 95%-CI above the 45°-line (Fig. 4). At  
279 higher target DNA levels, this trend was reversed. However, for *S. fontinalis* and *C. gobio* in  
280 singleplex celPCR and *S. cephalus* in multiplex celPCR, the 95%-CI does not include the 45°-  
281 line at both the lower and upper end of the investigated DNA concentrations.

282           The highest dilutions which produced positive amplifications ( $\geq 0.08$  RFU; LOD) in  
283 singleplex and multiplex celPCRs contained target DNA quantities as measured via dPCR  
284 ranging from 0.6 to 8.1 copies per  $\mu\text{l}$  diluted extract. The LOQs in both singleplex and multiplex  
285 celPCRs inferred from triplicate dPCR measurements covered concentrations from 0.6 to 13  
286 copies per  $\mu\text{l}$  extract (Table 4). As singleplex and multiplex PCRs both contained 1  $\mu\text{l}$  of diluted  
287 extract, copies per  $\mu\text{l}$  are equivalent to copies in PCR.

288           Of the five field samples per target species which tested negative in multiplex celPCR,  
289 all but two were also negative in dPCR (one sample positive for *S. trutta* with 0.25 copies per  $\mu\text{l}$   
290 extract and one positive for *C. gobio* with 0.13 copies per  $\mu\text{l}$  extract). The linear models  
291 describing for each primer pair the relationship between RFU and  $\ln$ -transformed copy number  
292 in field-collected samples showed different  $R^2$  levels ranging from 0.13 to 0.82 (SI2d, Fig. 5  
293 upper panel). When comparing observed to predicted copy numbers, the data obtained from  
294 field samples fit well with data obtained from the dilution series experiment for *C. gobio*,  
295 *O. mykiss* and *S. trutta*. However, for all six primer pairs, the dispersion was higher for data  
296 derived from field-collected samples than for the dilution series data generated from tissue  
297 extracts (Fig. 5 lower panel). Ultimately, the observed and predicted copy numbers obtained  
298 from field-collected samples represent only a small part of the range examined via the dilution  
299 series and for *C. gobio*, *S. cephalus*, *S. fontinalis*, and *T. thymallus* align themselves at or  
300 beneath the lowest concentrations in the experiment (Fig. 5 lower panel).

301

302

### 303 **Discussion**

304 Our results demonstrate the capacity of celPCR to provide a quantitative analysis of target  
305 eDNA copy number. After considering primer identity separately for singleplex and multiplex  
306 celPCR, it was possible to predict the number of target DNA copies in diluted extracts for each  
307 of the species-specific primer pairs. Furthermore, both singleplex and multiplex celPCR  
308 displayed high levels of sensitivity for diluted tissue extracts and field-collected eDNA samples,  
309 thus enabling the future application of cost-efficient multiplexes in large-scale screenings for  
310 target eDNA.

311 The comparison of DNA concentrations measured directly via dPCR to the signal  
312 strengths (RFU) measured via celPCR displays the exponential nature of endpoint PCR [19,52].  
313 The diluted extracts processed simultaneously and in triplicate with both approaches showed  
314 increasing signal strength variability with increasing target DNA concentration. This is due to the  
315 endpoint reaction not being split into thousands of separate reactions [10]; hence, slight  
316 differences in DNA quantities at the start of the reaction can have strong effects on the final  
317 signal strengths. The signal strength in celPCR is also subject to saturation effects commonly  
318 occurring in the later stages of PCR and caused by template re-annealing, exhaustion of NTPs  
319 or primers, or loss of polymerase activity [53]. In our experiment, these two effects were visible  
320 for RFU > 3, and as none of the field-collected samples resulted in RFU > 2, they do not prevent  
321 the general semi-quantitative estimation of eDNA concentration from field-collected samples.  
322 Nevertheless, celPCRs of individual samples should be carried out in triplicate for accurate  
323 quantification, especially if higher target DNA concentrations are expected.

324 For the prediction of absolute target DNA concentrations from RFU it was necessary to  
325 account for primer effects, albeit the primer pairs were designed for equal amplification  
326 efficiency at uniform PCR conditions. As previously recommended [17,34], melting temperatures

327 were as close as possible to 60 °C and the variation in fragment length (89-226 bp) was kept as  
328 small as possible and within the general suggestion for the detection of low concentrations of  
329 potentially degraded DNA from mixed samples [32]. The selected primers displayed minimal  
330 secondary structures and no competition for priming sites [17,34], and the multiplex PCRs were  
331 calibrated for equal amplification efficiency by adjusting primer concentrations in tests with  
332 target DNA templates [17,27]. However, all these measures were not sufficient to completely  
333 eliminate primer bias *a priori* for both singleplex and multiplex PCRs. A direct estimate of target  
334 DNA concentration was made possible by relating the RFU to absolute concentrations  
335 measured via dPCR and accounting for primer effects in linear mixed effects models. In our  
336 dilution series experiment, copy numbers predicted from singleplex or multiplex celPCR did not  
337 differ significantly from copy numbers measured with dPCR for most of the target species  
338 (exception *S. fontinalis*, *C. gobio* singleplex celPCR and *S. cephalus* multiplex celPCR) and the  
339 majority of individual copy numbers inferred from RFU fell inside the 95%-CI for concentrations  
340 below ~200 copies per  $\mu$ l extract. Therefore, absolute DNA concentrations can be deduced from  
341 RFU, if the efficiency of the applied primer pair(s) is directly compared between celPCR and a  
342 PCR-type enabling absolute quantification (i.e. dPCR). The resulting model permits predictions  
343 of the investigated target DNA concentration range. The amplification efficiency of a specific  
344 primer pair can differ between singleplex and multiplex PCRs despite careful design: For  
345 example, at equal primer concentrations, a less efficient primer pair leads to lower RFU in  
346 singleplex celPCR. Contrastingly, the concentration of a highly efficient primer pair needs to be  
347 reduced in multiplex celPCR to obtain comparable amplification success between all targets.  
348 Hence, it is necessary for quantitative estimations based on celPCR to evaluate the exact  
349 assay, which is going to be deployed in large-scale screenings, using qPCR or dPCR.

350 Both singleplex and multiplex celPCRs displayed similar levels of sensitivity in our  
351 experiments and resulted in positive amplifications of all reaction triplicates at concentrations  
352 between two and 13 target copies per  $\mu$ l extract (equalling two to 13 copies per 10  $\mu$ l reaction

353 volume). Depending on the target species, this was achieved at the highest or the second  
354 highest dilution step, where one or five target copies per  $\mu\text{l}$  extract were expected, respectively.  
355 At these low concentrations the stochastic nature of PCR causes some variation in detection  
356 success [19] and based on the number of replicates and the orders of magnitude covered in the  
357 dilution-series experiment, it was not possible to further refine the LODs and LOQs for each  
358 target species [22,23]. Nevertheless, our ceIPCRs showed sufficient sensitivity to detect target  
359 DNA in field-collected samples from rivers characterized by low productivity and low fish  
360 densities, and copy numbers in field-collected samples were predictable with the model  
361 obtained from the dilution series experiment, even though some signals were below the lower  
362 limit of the dilution series. If target DNA is expected to be present mostly at concentrations  
363 below 10 copies per  $\mu\text{l}$  extract (i.e. 10 copies per 10  $\mu\text{l}$  PCR reaction volume), it is, however,  
364 possible to pre-amplify target DNA with a preceding singleplex PCR targeting for example all  
365 fish DNA contained in a sample [39]. Our results were consistent between dPCR, and multiplex  
366 ceIPCR, except for two field-collected samples, which tested negative in multiplex ceIPCR, but  
367 contained  $< 0.25$  copies per  $\mu\text{l}$  extract in dPCR. Such low-concentration positives (below the  
368 LOD) have been previously observed in dPCR [22] and should be re-tested for further  
369 evaluation as these can be true positives, but also result from background signals of fluorescing  
370 foreign particles [54,55].

371 For all PCR platforms and visualization methods used in this study, a threshold is used  
372 to differentiate negative from positive results. In dPCR, this separates positive from negative  
373 droplets [10,56], whereas the lowest fluorescence signal distinctly different from background  
374 noise needs to be specified for both qPCR [22] and capillary electrophoresis [17]. The detection  
375 threshold of  $\geq 0.08$  RFU employed for both singleplex and multiplex ceIPCRs enabled the clear  
376 distinction of successful amplification from background fluorescence and was chosen based on  
377 previously used thresholds (0.07 and 0.1 RFU [27,57]) and after reviewing background signals  
378 in PCR and extraction negative controls. In dPCR, we chose to set a conservative threshold

379 right below the cloud of positive droplets [56], therefore the amplitude of the threshold varied  
380 depending on the length of the target fragment. The use of EvaGreen Supermix made results  
381 directly comparable between celPCR and dPCR since the same primer pairs were used.  
382 However, this dPCR chemistry should be used with care, as the levels of background  
383 fluorescence can vary between field-collected samples.

384 The possibility for quantification via multiplex celPCR is appealing for target eDNA  
385 detection from high sample numbers. Especially commercial providers of eDNA services and  
386 smaller laboratories, which do not always have access to the newest technological advances,  
387 could benefit from this sensitive and cost-efficient approach (Table 1) when handling large  
388 sample numbers. While the semi-quantitative assessment of eDNA levels contained in field-  
389 collected samples is possible via celPCR after designing specific primers and optimizing the  
390 celPCR for maximum sensitivity, direct inference of the DNA concentration in the sample and  
391 absolutely quantitative comparisons between target species are only possible when accounting  
392 for primer effects and calibrating celPCR results using dPCR. Nevertheless, multiplex celPCR is  
393 a highly sensitive and broadly applicable approach for the detection and quantification of eDNA  
394 and will enable efficient and large-scale screenings in the context of species distribution  
395 monitoring at more affordable costs.

396

397

### 398 **Acknowledgements**

399 This research was funded by the Austria Research Promotion Agency (FFG; project number  
400 853219 awarded to MT). We are very grateful to D. Kirschner for his support in the collection of  
401 water samples, and D. Sint, M. Böcker and the members of the “Steinke Lab” for helpful  
402 comments on earlier manuscript versions and for pointing out additional references.

403

### 404 **Conflict of Interest**



405 MT is the co-founder of Sinsoma GmbH, a for-profit company dedicated to the analysis of DNA  
406 in environmental studies.

407

#### 408 **Author contribution statement**

409 MT conceived the study; BT and MT were responsible for study design. BT and YP carried out  
410 field sampling and laboratory analyses, BT analysed the data and wrote the first draft of the  
411 manuscript which was revised by YP and MT.

412

#### 413 **Data Availability Statement**

414 All singleplex and multiplex ceI-PCR and dPCR data obtained during the dilution series  
415 experiment and the analysis of field-collected samples have been uploaded to Figshare and are  
416 available at <https://doi.org/10.6084/m9.figshare.13139645.v1>

417

## 418 References

419

- 420 1. Bohmann K, Evans A, Gilbert MTP, Carvalho GR, Creer S, Knapp M, et al.  
421 Environmental DNA for wildlife biology and biodiversity monitoring. *Trends Ecol Evol.*  
422 2014;29: 358–367. doi:10.1016/j.tree.2014.04.003
- 423 2. Rees HC, Maddison BC, Middleditch DJ, Patmore JRM, Gough KC. The detection of  
424 aquatic animal species using environmental DNA - a review of eDNA as a survey tool in  
425 ecology. *J Appl Ecol.* 2014;51: 1450–1459. doi:10.1111/1365-2664.12306
- 426 3. Deiner K, Bik HM, Mächler E, Seymour M, Lacoursière-Roussel A, Altermatt F, et al.  
427 Environmental DNA metabarcoding: Transforming how we survey animal and plant  
428 communities. *Mol Ecol.* 2017;26: 5872–5895. doi:10.1111/mec.14350
- 429 4. Goldberg CS, Turner CR, Deiner K, Klymus KE, Thomsen PF, Murphy MA, et al. Critical  
430 considerations for the application of environmental DNA methods to detect aquatic  
431 species. *Methods Ecol Evol.* 2016;7: 1299–1307. doi:10.1111/2041-210X.12595
- 432 5. Harper LR, Buxton AS, Rees HC, Bruce K, Brys R, Halfmaerten D, et al. Prospects and  
433 challenges of environmental DNA (eDNA) monitoring in freshwater ponds. *Hydrobiologia.*  
434 2019;826: 25–41. doi:10.1007/s10750-018-3750-5
- 435 6. Lawson Handley L, Read DS, Winfield IJ, Kimbell H, Johnson H, Li J, et al. Temporal and  
436 spatial variation in distribution of fish environmental DNA in England’s largest lake.  
437 *Environ DNA.* 2019;1: 26–39. doi:10.1002/edn3.5
- 438 7. Sepulveda AJ, Nelson NM, Jerde CL, Luikart G. Are Environmental DNA Methods Ready  
439 for Aquatic Invasive Species Management? *Trends Ecol Evol.* 2020;0.  
440 doi:10.1016/j.tree.2020.03.011
- 441 8. Cilleros K, Valentini A, Allard L, Dejean T, Etienne R, Grenouillet G, et al. Unlocking  
442 biodiversity and conservation studies in high-diversity environments using environmental  
443 DNA (eDNA): A test with Guianese freshwater fishes. *Mol Ecol Resour.* 2019.  
444 doi:10.1111/1755-0998.12900
- 445 9. Port JA, O’Donnell JL, Romero-Maraccini OC, Leary PR, Litvin SY, Nickols KJ, et al.  
446 Assessing vertebrate biodiversity in a kelp forest ecosystem using environmental DNA.  
447 *Mol Ecol.* 2016;25: 527–541. doi:10.1111/mec.13481
- 448 10. Doi H, Uchii K, Takahara T, Matsushashi S, Yamanaka H, Minamoto T. Use of droplet  
449 digital PCR for estimation of fish abundance and biomass in environmental DNA surveys.  
450 Mahon AR, editor. *PLoS One.* 2015;10: 1–11. doi:10.1371/journal.pone.0122763
- 451 11. MacDonald AJ, Sarre SD. A framework for developing and validating taxon-specific  
452 primers for specimen identification from environmental DNA. *Mol Ecol Resour.* 2017;17:  
453 708–720. doi:10.1111/1755-0998.12618
- 454 12. Clusa L, García-Vázquez E. A simple, rapid method for detecting seven common invasive  
455 fish species in Europe from environmental DNA. *Aquat Conserv Mar Freshw Ecosyst.*  
456 2018;28: 619–629. doi:10.1002/aqc.2890
- 457 13. Doi H, Takahara T, Minamoto T, Matsushashi S, Uchii K, Yamanaka H. Droplet digital  
458 polymerase chain reaction (PCR) outperforms real-time PCR in the detection of  
459 environmental DNA from an invasive fish species. *Environ Sci Technol.* 2015;49: 5601–  
460 5608. doi:10.1021/acs.est.5b00253
- 461 14. Hindson CM, Chevillet JR, Briggs HA, Gallichotte EN, Ruf IK, Hindson BJ, et al. Absolute  
462 quantification by droplet digital PCR versus analog real-time PCR. *Nat Methods.* 2013;10:  
463 1003–1005. doi:10.1038/nmeth.2633
- 464 15. Rees HC, Bishop K, Middleditch DJ, Patmore JRM, Maddison BC, Gough KC. The  
465 application of eDNA for monitoring of the Great Crested Newt in the UK. *Ecol Evol.*  
466 2014;4: 4023–4032. doi:10.1002/ece3.1272

- 467 16. Schmelzle MC, Kinziger AP. Using occupancy modelling to compare environmental DNA  
468 to traditional field methods for regional-scale monitoring of an endangered aquatic  
469 species. *Mol Ecol Resour.* 2016;16: 895–908. doi:10.1111/1755-0998.12501
- 470 17. Sint D, Raso L, Traugott M. Advances in multiplex PCR: Balancing primer efficiencies  
471 and improving detection success. *Methods Ecol Evol.* 2012;3: 898–905.  
472 doi:10.1111/j.2041-210X.2012.00215.x
- 473 18. Thalinger B, Wolf E, Traugott M, Wanzenböck J. Monitoring spawning migrations of  
474 potamodromous fish species via eDNA. *Sci Rep.* 2019;9. doi:10.1038/s41598-019-  
475 51398-0
- 476 19. Rennstam Rubbmark O, Sint D, Cupic S, Traugott M. When to use next generation  
477 sequencing or diagnostic PCR in diet analyses. *Mol Ecol Resour.* 2019;19: 388–399.  
478 doi:10.1111/1755-0998.12974
- 479 20. Oehm J, Thalinger B, Eisenkölbl S, Traugott M. Diet analysis in piscivorous birds: What  
480 can the addition of molecular tools offer? *Ecol Evol.* 2017;7. doi:10.1002/ece3.2790
- 481 21. Thalinger B, Kirschner D, Pütz Y, Moritz C, Schwarzenberger R, Wanzenböck J, et al.  
482 Lateral and longitudinal fish eDNA distribution in dynamic riverine habitats. *bioRxiv.* 2020;  
483 2020.05.28.120147. doi:10.1101/2020.05.28.120147
- 484 22. Hunter ME, Dorazio RM, Butterfield JSS, Meigs-Friend G, Nico LG, Ferrante JA.  
485 Detection limits of quantitative and digital PCR assays and their influence in presence–  
486 absence surveys of environmental DNA. *Mol Ecol Resour.* 2017;17: 221–229.  
487 doi:10.1111/1755-0998.12619
- 488 23. Klymus KE, Merkes CM, Allison MJ, Goldberg CS, Helbing CC, Hunter ME, et al.  
489 Reporting the limits of detection and quantification for environmental DNA assays.  
490 *Environ DNA.* 2019; edn3.29. doi:10.1002/edn3.29
- 491 24. Bustin SA, Benes V, Garson JA, Hellemans J, Huggett J, Kubista M, et al. The MIQE  
492 guidelines: Minimum information for publication of quantitative real-time PCR  
493 experiments. *Clin Chem.* 2009;55: 611–622. doi:10.1373/clinchem.2008.112797
- 494 25. Bio-Rad. Rare Mutation Detection Best Practices Guidelines. 2016. Available:  
495 [http://www.bio-rad.com/webroot/web/pdf/lsr/literature/Bulletin\\_6628.pdf](http://www.bio-rad.com/webroot/web/pdf/lsr/literature/Bulletin_6628.pdf)
- 496 26. Deprez L, Corbisier P, Kortekaas AM, Mazoua S, Beaz Hidalgo R, Trapmann S, et al.  
497 Validation of a digital PCR method for quantification of DNA copy number concentrations  
498 by using a certified reference material. *Biomol Detect Quantif.* 2016;9: 29–39.  
499 doi:10.1016/j.bdq.2016.08.002
- 500 27. Thalinger B, Oehm J, Mayr H, Obwexer A, Zeisler C, Traugott M. Molecular prey  
501 identification in Central European piscivores. *Mol Ecol Resour.* 2016;16: 123–137.  
502 doi:10.1111/1755-0998.12436
- 503 28. Turner CR, Miller DJ, Coyne KJ, Corush J. Improved methods for capture, extraction, and  
504 quantitative assay of environmental DNA from Asian bigheaded carp  
505 (*hypophthalmichthys* spp.). *PLoS One.* 2014;9: 1–20. doi:10.1371/journal.pone.0114329
- 506 29. Nathan LM, Simmons M, Wegleitner BJ, Jerde CL, Mahon AR. Quantifying environmental  
507 DNA signals for aquatic invasive species across multiple detection platforms. *Environ Sci*  
508 *Technol.* 2014;48: 12800–12806. doi:10.1021/es5034052
- 509 30. Wilcox TM, Carim KJ, McKelvey KS, Young MK, Schwartz MK. The dual challenges of  
510 generality and specificity when developing environmental DNA markers for species and  
511 subspecies of *Oncorhynchus*. Mahon AR, editor. *PLoS One.* 2015;10: e0142008.  
512 doi:10.1371/journal.pone.0142008
- 513 31. Boothroyd M, Mandrak NE, Fox M, Wilson CC. Environmental DNA (eDNA) detection and  
514 habitat occupancy of threatened spotted gar (*Lepisosteus oculatus*). *Aquat Conserv Mar*  
515 *Freshw Ecosyst.* 2016;26: 1107–1119. doi:10.1002/aqc.2617
- 516 32. King RA, Read DS, Traugott M, Symondson WOC. Molecular analysis of predation: A  
517 review of best practice for DNA-based approaches. *Mol Ecol.* 2008;17: 947–963.

- 518 doi:10.1111/j.1365-294X.2007.03613.x
- 519 33. Masseret E, Enquebecq M, Laabir M, Genovesi B, Vaquer A, Avarre J-C. A simple and  
520 innovative method for species identification of phytoplankton cells on minute quantities of  
521 DNA. *Environ Microbiol Rep.* 2010;2: 715–719. doi:10.1111/j.1758-2229.2010.00164.x
- 522 34. Tsuji S, Iguchi Y, Shibata N, Teramura I, Kitagawa T, Yamanaka H. Real-time multiplex  
523 PCR for simultaneous detection of multiple species from environmental DNA: An  
524 application on two Japanese medaka species. *Sci Rep.* 2018;8: 1–8.  
525 doi:10.1038/s41598-018-27434-w
- 526 35. Sint D, Kaufmann R, Mayer R, Traugott M. Resolving the predator first paradox:  
527 Arthropod predator food webs in pioneer sites of glacier forelands. *Mol Ecol.* 2019;28:  
528 336–347. doi:10.1111/mec.14839
- 529 36. Wittwer CT. High-resolution DNA melting analysis: advancements and limitations. *Hum*  
530 *Mutat.* 2009;30: 857–859. doi:10.1002/humu.20951
- 531 37. Whale AS, Huggett JF, Tzonev S. Fundamentals of multiplexing with digital PCR.  
532 *Biomolecular Detection and Quantification.* Elsevier GmbH; 2016. pp. 15–23.  
533 doi:10.1016/j.bdq.2016.05.002
- 534 38. GUICHOUX E, LAGACHE L, WAGNER S, CHAUMEIL P, LÉGER P, LEPAIS O, et al.  
535 Current trends in microsatellite genotyping. *Mol Ecol Resour.* 2011;11: 591–611.  
536 doi:10.1111/j.1755-0998.2011.03014.x
- 537 39. Wilcox TM, McKelvey KS, Young MK, Engkjer C, Lance RF, Lahr A, et al. Parallel,  
538 targeted analysis of environmental samples via high-throughput quantitative PCR.  
539 *Environ DNA.* 2020; edn3.80. doi:10.1002/edn3.80
- 540 40. Hall TA. BioEdit: a user-friendly biological sequence alignment editor and analysis  
541 program for Windows 95/98/NT. *Nucleic Acids Symp Ser.* 1999;41: 95–98.
- 542 41. Juen A, Traugott M. Amplification facilitators and multiplex PCR: Tools to overcome PCR-  
543 inhibition in DNA-gut-content analysis of soil-living invertebrates. *Soil Biol Biochem.*  
544 2006;38: 1872–1879. doi:10.1016/j.soilbio.2005.11.034
- 545 42. Chevet E, Lemaie G, Katinka MD. Low concentrations of tetramethylammonium chloride  
546 increase yield and specificity of PCR. *Nucleic Acids Res.* 1995;23: 3343–3344.  
547 doi:10.1093/nar/23.16.3343
- 548 43. R Core Team. R: A Language and Environment for Statistical Computing. Vienna,  
549 Austria: R Foundation for Statistical Computing; 2020. Available: [https://www.r-](https://www.r-project.org/)  
550 [project.org/](https://www.r-project.org/)
- 551 44. Wickham H. *ggplot2: Elegant Graphics for Data Analysis.* Springer-Verlag New York;  
552 2016. Available: <https://ggplot2.tidyverse.org>
- 553 45. Kassambara A. *ggpubr: “ggplot2” Based Publication Ready Plots.* 2019. Available:  
554 <https://cran.r-project.org/package=ggpubr>
- 555 46. Komsta L. *outliers: Tests for outliers.* 2011. Available: [https://cran.r-](https://cran.r-project.org/package=outliers)  
556 [project.org/package=outliers](https://cran.r-project.org/package=outliers)
- 557 47. Bates D, Mächler M, Bolker B, Walker S. Fitting Linear Mixed-Effects Models Using lme4.  
558 *J Stat Softw.* 2015;67: 1--48. doi:10.18637/jss.v067.i01
- 559 48. Pinheiro J, Bates D, DebRoy S, Sarkar D, R Core Team. *nlme: Linear and Nonlinear*  
560 *Mixed Effects Models.* 2020. Available: <https://cran.r-project.org/package=nlme>
- 561 49. Barton K. *MuMIn: Multi-Model Inference.* 2019. Available: [https://cran.r-](https://cran.r-project.org/package=MuMIn)  
562 [project.org/package=MuMIn](https://cran.r-project.org/package=MuMIn)
- 563 50. Agersnap S, Larsen WB, Knudsen SW, Strand D, Thomsen PF, Hesselsøe M, et al.  
564 Monitoring of noble, signal and narrow-clawed crayfish using environmental DNA from  
565 freshwater samples. Doi H, editor. *PLoS One.* 2017;12: e0179261.  
566 doi:10.1371/journal.pone.0179261
- 567 51. Burns MJ, Nixon GJ, Foy CA, Harris N. Standardisation of data from real-time  
568 quantitative PCR methods - Evaluation of outliers and comparison of calibration curves.

- 569 BMC Biotechnol. 2005;5: 31. doi:10.1186/1472-6750-5-31  
570 52. Kelly RP, Shelton AO, Gallego R. Understanding PCR Processes to Draw Meaningful  
571 Conclusions from Environmental DNA Studies. Sci Rep. 2019;9: 1–14.  
572 doi:10.1038/s41598-019-48546-x  
573 53. Chatterjee N, Banerjee T, Datta S. Accurate estimation of nucleic acids by amplification  
574 efficiency dependent PCR. PLoS One. 2012;7. doi:10.1371/journal.pone.0042063  
575 54. Strain MC, Lada SM, Luong T, Rought SE, Gianella S, Terry VH, et al. Highly Precise  
576 Measurement of HIV DNA by Droplet Digital PCR. Wu Y, editor. PLoS One. 2013;8:  
577 e55943. doi:10.1371/journal.pone.0055943  
578 55. Kiselina M, Pasternak AO, De Spiegelaere W, Vogelaers D, Berkhout B,  
579 Vandekerckhove L. Comparison of Droplet Digital PCR and Seminested Real-Time PCR  
580 for Quantification of Cell-Associated HIV-1 RNA. Harrigan PR, editor. PLoS One. 2014;9:  
581 e85999. doi:10.1371/journal.pone.0085999  
582 56. Baker CS, Steel D, Nieukirk S, Klinck H. Environmental DNA (eDNA) From the Wake of  
583 the Whales: Droplet Digital PCR for Detection and Species Identification. Front Mar Sci.  
584 2018;5: 133. doi:10.3389/fmars.2018.00133  
585 57. Thalinger B, Oehm J, Zeisler C, Vorhauser J, Traugott M. Sex-specific prey partitioning in  
586 breeding piscivorous birds examined via a novel, noninvasive approach. Ecol Evol.  
587 2018;8. doi:10.1002/ece3.4421  
588

589 **Tables and Figures**

590

591 **Table 1:** Comparison of PCR reagent costs per reaction between commonly used kits for  
592 dPCR, qPCR and ceI PCR (prices in CAD are calculated from lot sizes of 5,000 reactions;  
593 retrieved on 24<sup>th</sup> October 2020).

594

| PCR-type | supplier                 | product name                             | reaction volume [μl] | Price        |
|----------|--------------------------|------------------------------------------|----------------------|--------------|
| ceI PCR  | Qiagen                   | Multiplex PCR Kit                        | 10                   | 0.57         |
| dPCR     | Bio-Rad                  | EvaGreen Supermix<br>Supermix for Probes | 20<br>20             | 1.38<br>1.38 |
| qPCR     | Thermo Fisher Scientific | TaqPath™ qPCR Master Mix, CG             | 20                   | 1.57         |

595

596

597 **Table2:** The target fish species and the associated species-specific primer pairs. The target gene, fragment length, association with one of the  
 598 two multiplex assays (MP) and the respective primer concentrations in multiplex and singleplex celPCR are provided.

599

| Species                      | Primer name   | 5' - 3'                  | Target gene | fragment length (bp) | MP # | Concentration in MP (μM) | Concentration in SP (μM) |
|------------------------------|---------------|--------------------------|-------------|----------------------|------|--------------------------|--------------------------|
| <i>Salmo trutta</i>          | Sal-tru-S1002 | TCTCTTGA TTCGGGCAGAACTC  | COI         | 89                   | 1    | 0.4                      | 0.5                      |
|                              | Sal-tru-A1002 | CGAAGGCA TGGGCTGTAACA    |             |                      | 1    | 0.4                      | 0.5                      |
| <i>Salvelinus fontinalis</i> | Salfon-S715   | CCTCCCGCCCTCCTTTCTA      | COI         | 152                  | 1    | 0.45                     | 0.5                      |
|                              | Salfon-A715   | TGCCAGCTAAA TGTAGGGAAAAA |             |                      | 1    | 0.45                     | 0.5                      |
| <i>Thymallus thymallus</i>   | Thythy-S720   | GGAGCCCTTCTGGGTGATGAT    | COI         | 226                  | 1    | 0.2                      | 0.5                      |
|                              | Thythy-A720   | TTCAA CCCCAGA TGAGGCTAAG |             |                      | 1    | 0.2                      | 0.5                      |
| <i>Oncorhynchus mykiss</i>   | Oncmyk-S714   | ATAAAACCTCCAGCCATCTCTCAG | COI         | 94                   | 2    | 0.4                      | 0.5                      |
|                              | Oncmyk-A714   | GGACGGGGAGGGAAAGTAAYAG   |             |                      | 2    | 0.4                      | 0.5                      |
| <i>Salvelinus umbla</i>      | Salumb-S717   | GCTTCTGACTCCTCCACCG      | COI         | 142                  | 2    | 0.15                     | 0.5                      |
|                              | Salumb-A717   | AAGATAGTAAA TCAACGGAGGCC |             |                      | 2    | 0.15                     | 0.5                      |
| <i>Squalius cephalus</i>     | Squcep-S719   | TCGGAAACTGACTTGTCCTCG    | COI         | 184                  | 2    | 0.15                     | 0.5                      |
|                              | Squcep-A719   | GCGTGAGCAAGATTGCCC       |             |                      | 2    | 0.15                     | 0.5                      |
| <i>Cottus gobio</i>          | Cotgob1-S712  | GAAGCAGGTGCCGGAACC       | COI         | 206                  | 2    | 0.4                      | 0.5                      |
|                              | Cotgob1-A712  | GATCA TACGAAGA GCGGGGTC  |             |                      | 2    | 0.4                      | 0.5                      |

600

601 **Table 3:** Linear mixed models for singleplex and multiplex ceI PCR  
 602

| <b>Singleplex PCR (Model 1)</b> |                      | <b>Random effects</b>     |                        | <b>Variance</b>     |                | <b>Standard deviation</b> |  |
|---------------------------------|----------------------|---------------------------|------------------------|---------------------|----------------|---------------------------|--|
| <i>intercept</i>                |                      |                           |                        | 0.002               |                | 0.045                     |  |
| Mean SP PCR RFU                 |                      |                           |                        | 0.73                |                | 0.85                      |  |
| <b>Fixed effects</b>            |                      | <b>parameter estimate</b> | <b>lower 95% CI</b>    | <b>upper 95% CI</b> | <b>t-value</b> | <b>p-value</b>            |  |
| <i>intercept</i>                |                      | 1.36                      | 1.03                   | 1.69                | 8.09           | < 0.001 ***               |  |
| Mean SP PCR RFU                 |                      | 2.47                      | 1.76                   | 3.18                | 6.89           | < 0.001 ***               |  |
| <b>Estimated deviation</b>      | <b>species</b>       | <b>intercept</b>          | <b>Mean SP PCR RFU</b> |                     |                |                           |  |
|                                 | <i>C. gobio</i>      | -0.04                     | -0.79                  |                     |                |                           |  |
|                                 | <i>O. mykiss</i>     | 0.04                      | 0.79                   |                     |                |                           |  |
|                                 | <i>S. fontinalis</i> | 0.03                      | 0.60                   |                     |                |                           |  |
|                                 | <i>S. trutta</i>     | 0.04                      | 0.92                   |                     |                |                           |  |
|                                 | <i>S. cephalus</i>   | -0.03                     | -0.70                  |                     |                |                           |  |
|                                 | <i>T. thymallus</i>  | -0.04                     | -0.81                  |                     |                |                           |  |
| <b>Multiplex PCR (Model 2)</b>  |                      | <b>Random effects</b>     |                        | <b>Variance</b>     |                | <b>Standard deviation</b> |  |
| <i>intercept</i>                |                      |                           |                        | 0.24                |                | 0.49                      |  |
| Mean MP PCR RFU                 |                      |                           |                        | 0.63                |                | 0.79                      |  |
| <b>Fixed effects</b>            |                      | <b>parameter estimate</b> | <b>lower 95% CI</b>    | <b>upper 95% CI</b> | <b>t-value</b> | <b>p-value</b>            |  |
| <i>intercept</i>                |                      | 0.99                      | 0.46                   | 1.53                | 3.66           | < 0.001 ***               |  |
| Mean MP PCR RFU                 |                      | 2.77                      | 2.11                   | 3.44                | 8.24           | < 0.001 ***               |  |
| <b>Estimated deviation</b>      | <b>species</b>       | <b>intercept</b>          | <b>Mean SP PCR RFU</b> |                     |                |                           |  |
|                                 | <i>C. gobio</i>      | -0.05                     | -1.17                  |                     |                |                           |  |
|                                 | <i>O. mykiss</i>     | 0.47                      | 0.46                   |                     |                |                           |  |
|                                 | <i>S. fontinalis</i> | 0.06                      | 0.83                   |                     |                |                           |  |
|                                 | <i>S. trutta</i>     | 0.33                      | 0.58                   |                     |                |                           |  |
|                                 | <i>S. cephalus</i>   | -0.57                     | -0.11                  |                     |                |                           |  |
|                                 | <i>T. thymallus</i>  | -0.24                     | -0.60                  |                     |                |                           |  |

603

604

605



606 **Table 4:** The limit of detection (LOD; lowest target DNA amount with amplification) and limit  
607 of quantification LOQ (lowest target DNA amount with all technical replicates yielding a  
608 positive result) of multiplex and singleplex celPCR for the different species  
609

| <b>species</b>       | <b>LOD [copies/<math>\mu</math>l]</b>     | <b>LOQ [copies/<math>\mu</math>l]</b>          |
|----------------------|-------------------------------------------|------------------------------------------------|
| <i>C. gobio</i>      | 0.7                                       | 3.1 – 4.8                                      |
| <i>O. mykiss</i>     | 6.5 – 8.1                                 | 5.1 – 8.0 (singleplex)<br>9.4 – 13 (multiplex) |
| <i>S. cephalus</i>   | 0.6 – 2.4                                 | 9.1 – 12 (singleplex)<br>0.6 – 2.4             |
| <i>S. fontinalis</i> | 0.6 – 1.3                                 | 5.6 – 11 (singleplex)<br>0.6 – 1.3             |
| <i>S. trutta</i>     | 0.6 (singleplex)<br>2.3 – 7.3 (multiplex) | 2.3 – 7.3                                      |
| <i>T. thymallus</i>  | 1.8 – 2.4                                 | 5.2 – 13                                       |

610

611

612 **Figure 1:** Relative Fluorescence Units (RFU) and template DNA copy numbers per  $\mu\text{l}$  diluted  
613 extract obtained for *C. gobio*, *O. mykiss*, *S. fontinalis*, *S. trutta*, *S. cephalus*, and *T. thymallus*  
614 from singleplex celPCR, multiplex celPCR, and dPCR. Dilution steps from 5,000 copies to 1  
615 copy per  $\mu\text{l}$  extract are abbreviated 1 to 21.

616

617 **Figure 2:** Primer performance comparison based on mean RFU (dots) obtained from  
618 singleplex and multiplex celPCRs. The corresponding standard deviations are displayed as  
619 whiskers; the shaded area depicts the 95%-CIs; see SI2 for model specifications.

620

621 **Figure 3:** Linear models and mixed effect models for singleplex and multiplex celPCR in  
622 relation to copy numbers per  $\mu\text{l}$  extract (logarithmically scaled): panels a) and c) display  
623 mean RFU and copy number per dilution step and color coded by species, the black  
624 dashed line represents a linear model fitted onto this dataset without taking into account  
625 target species identity, the shaded area depicts the 95%-CIs; see SI2 for model  
626 specifications. Panels b) and d) show the mixed effects model using target species identity  
627 as random effect and permitting random slope and intercept (Tab. 2). Dots represent mean  
628 RFU and copy numbers per dilution step, with the corresponding standard deviations  
629 displayed as whiskers. The black dashed line depicts the linear model of the population  
630 mean; colored lines are the slopes associated with the individual species.

631

632 **Figure 4:** Observed copy numbers per  $\mu\text{l}$  extract (x-axis) plotted against the copy numbers  
633 predicted from the RFU obtained from singleplex celPCR (upper panel) and multiplex  
634 celPCR (lower panel). Per target species and PCR type, the comparisons are based on  
635 individual RFU obtained during the dilution series experiment. The black line (origin 0/0,  
636 slope 1) represents a perfect fit between observed and predicted copy numbers. For details  
637 on the linear models and 95% CIs illustrating the fit between observed and fitted copy  
638 numbers see SI2c.

639

640 **Figure 5:** The relationship between RFU and  $\ln$ -transformed target DNA copy numbers  
641 measured in field-collected samples for each of the primer pairs individually is displayed in  
642 the upper panel; for details on the linear models and their 95%-CIs see SI2d. The  
643 relationship between target DNA copy numbers measured in field-collected samples in  
644 comparison to the predicted copy numbers based on multiplex celPCR RFU of these field-  
645 collected samples is depicted in the lower panel. The black line (origin 0/0, slope 1)  
646 represents a perfect fit between observed and predicted copy numbers; the dashed  
647 regression line and the associated 95%-CIs are based on a comparison between measured  
648 and predicted copy numbers from the dilution series experiment. For details on the linear  
649 models and 95% CIs see SI2c.

Figure 1

singleplex ceIPCR

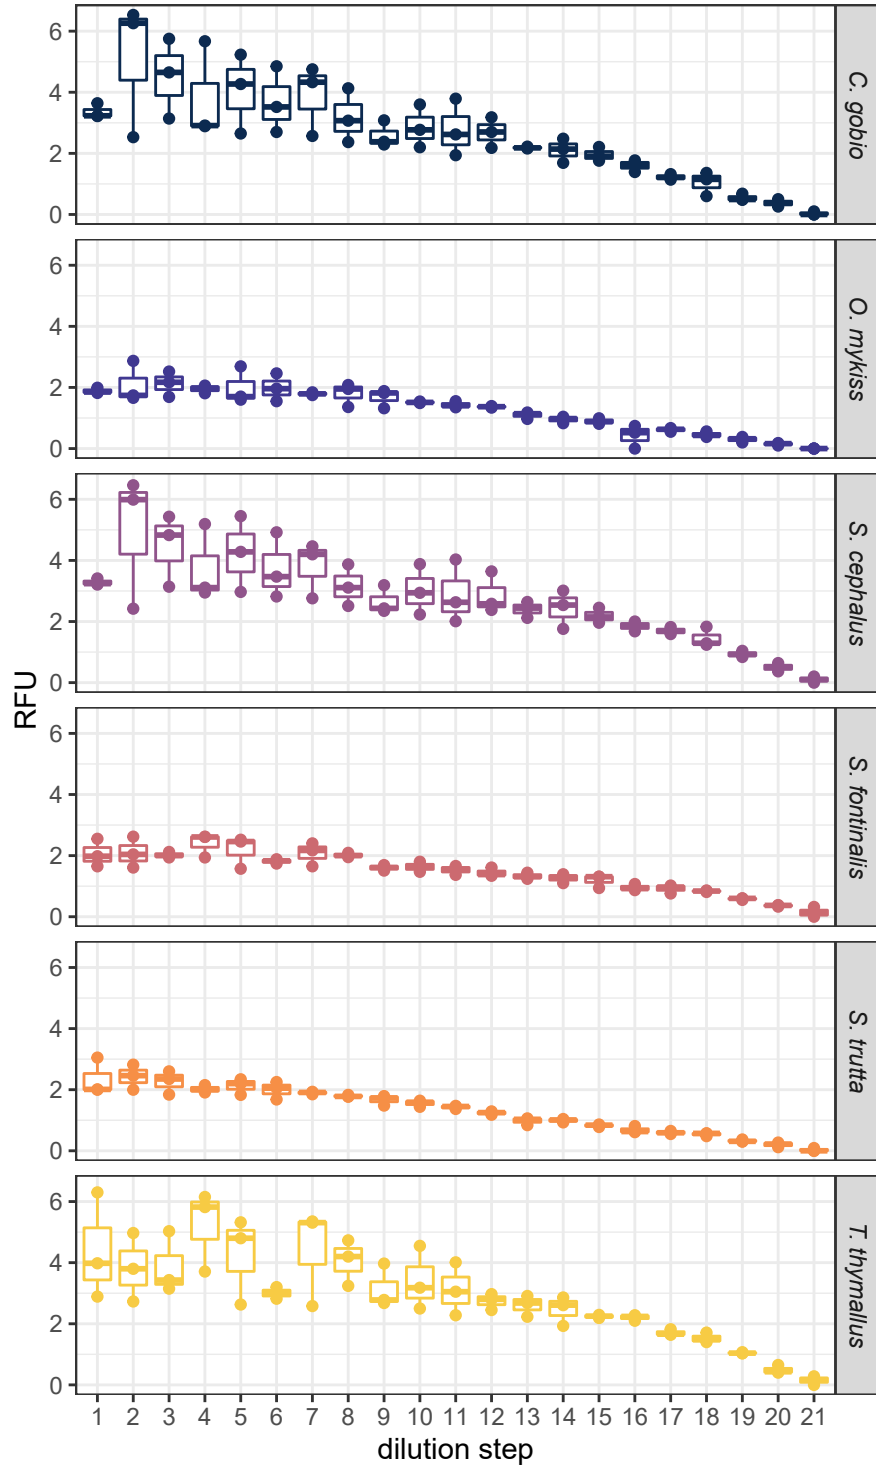

multiplex ceIPCR

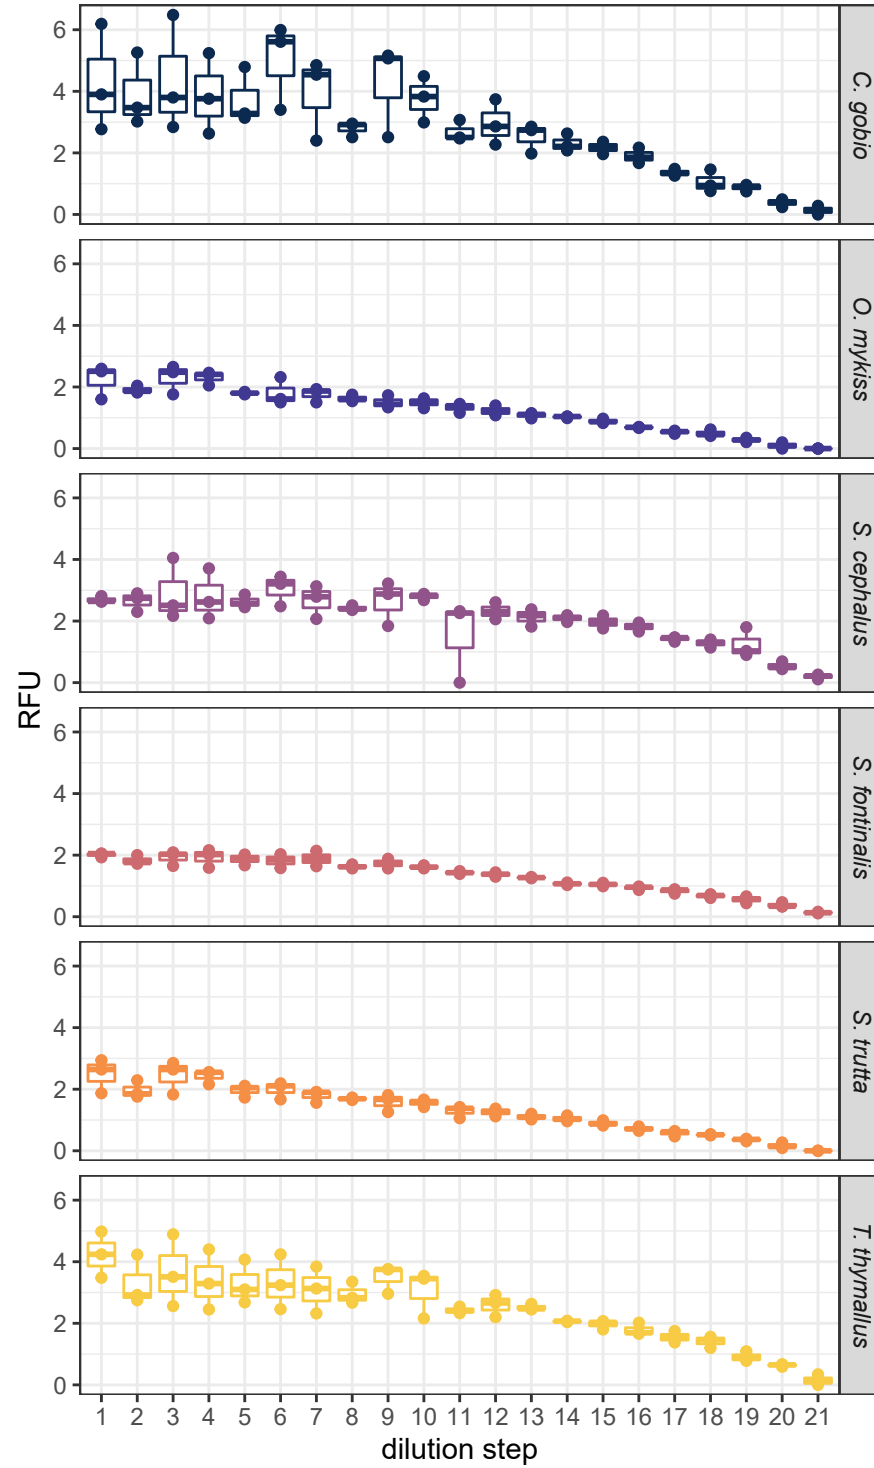

digital PCR

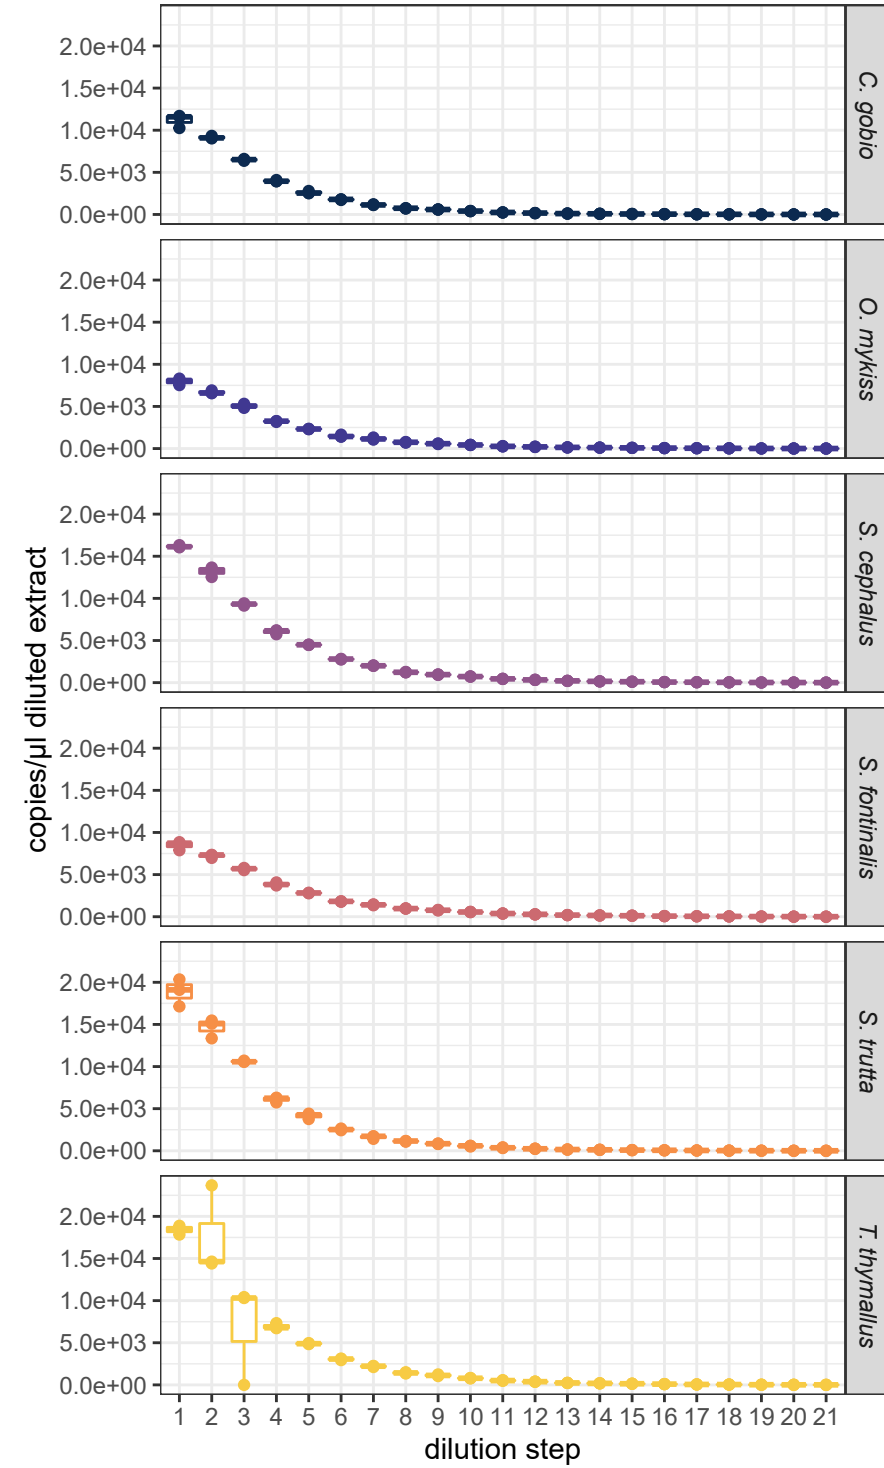

Figure 2

primer performance in singleplex vs. multiplex ceI-PCR

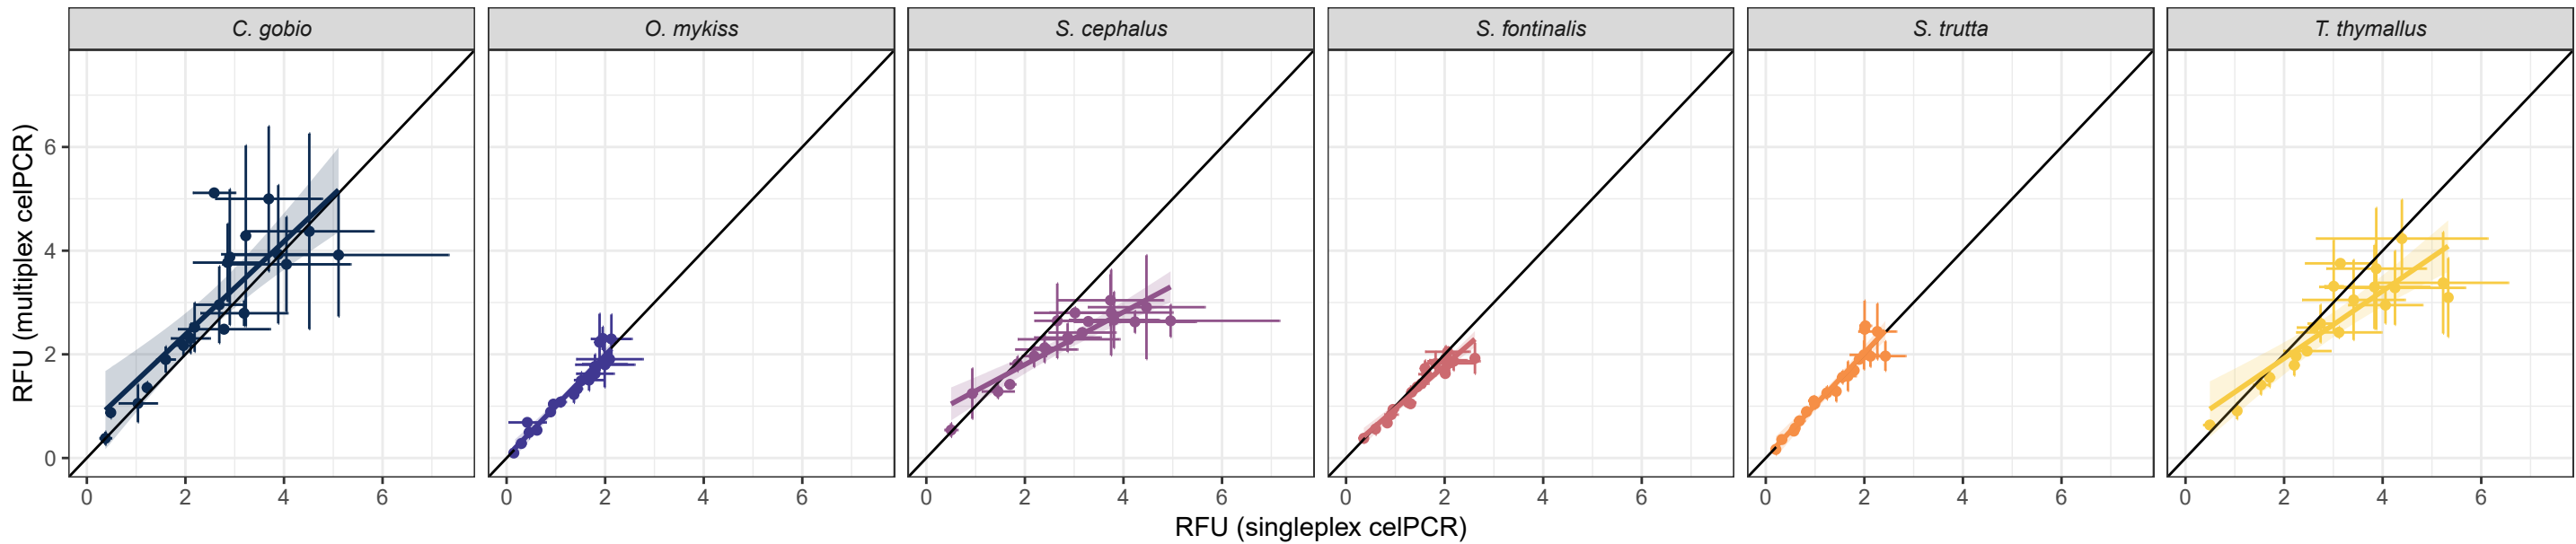

Figure 3

singleplex ceIPCR

multiplex ceIPCR

a)

c)

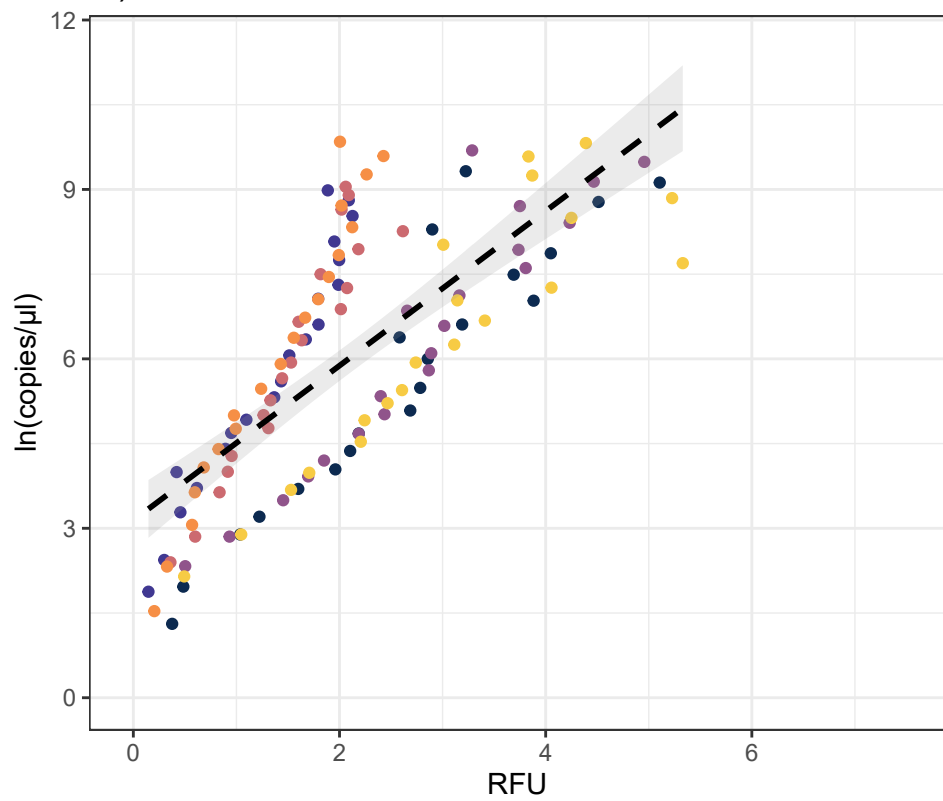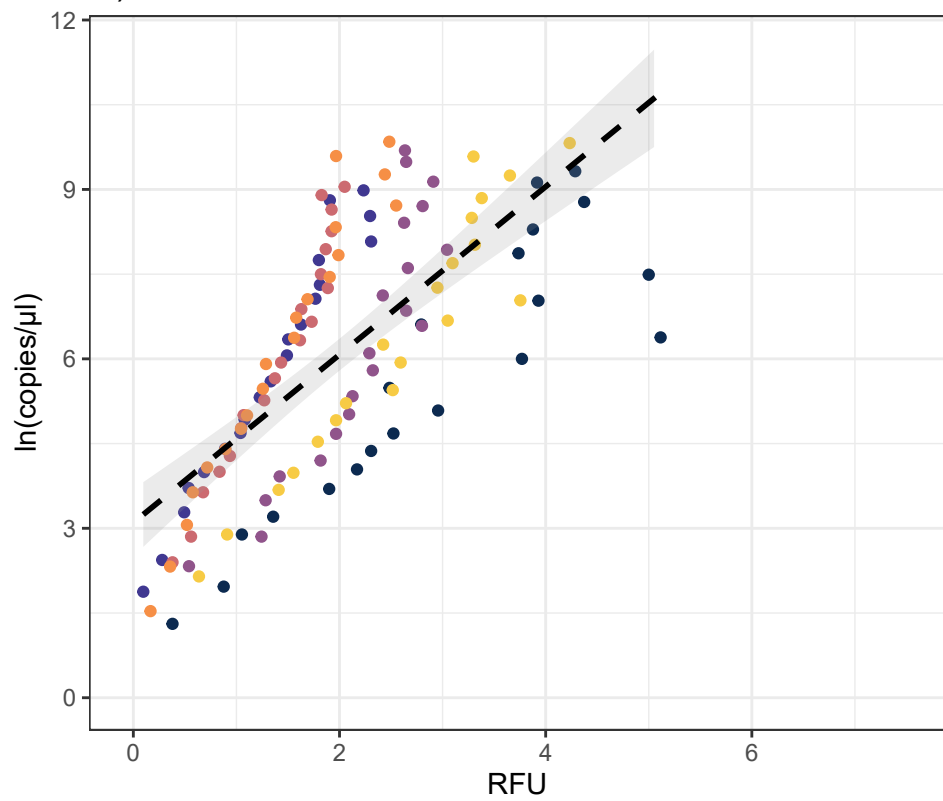

b)

d)

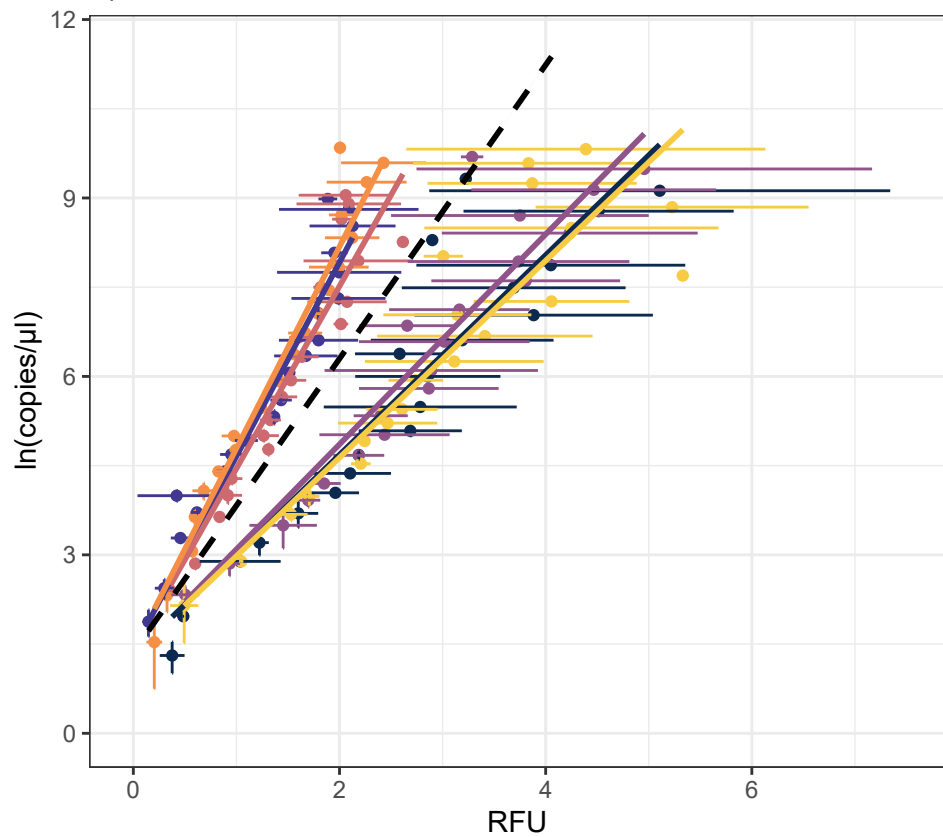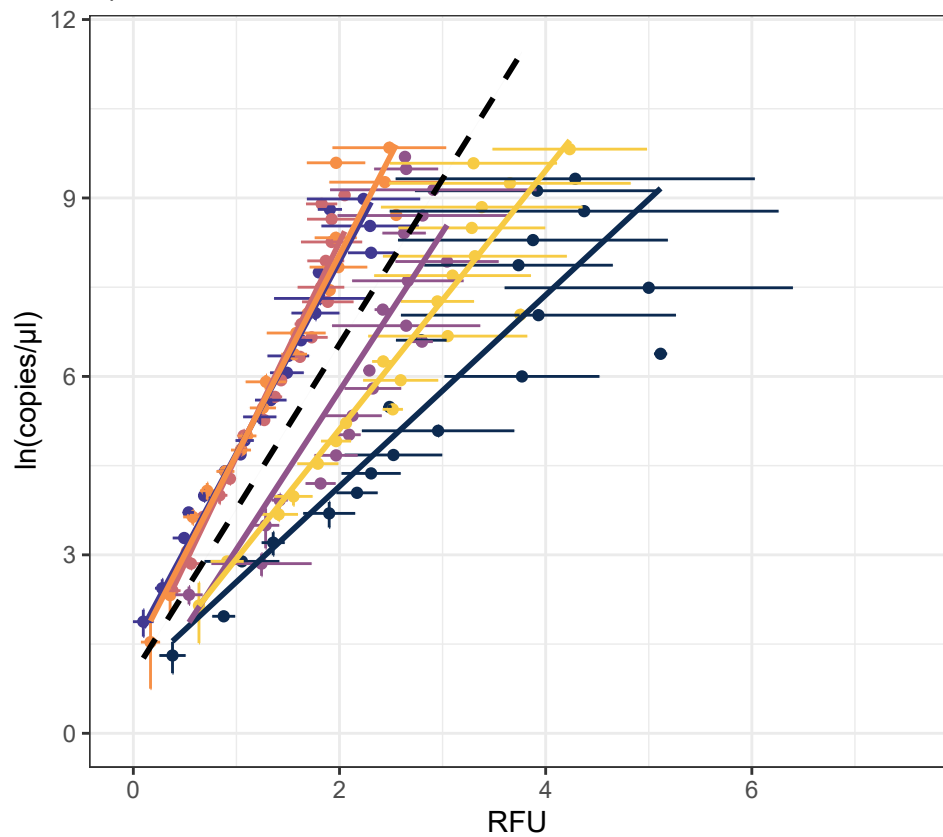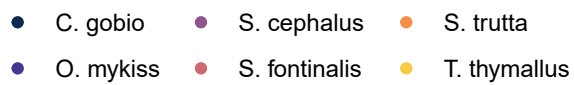

Figure 4

predicted from singleplex cePCR

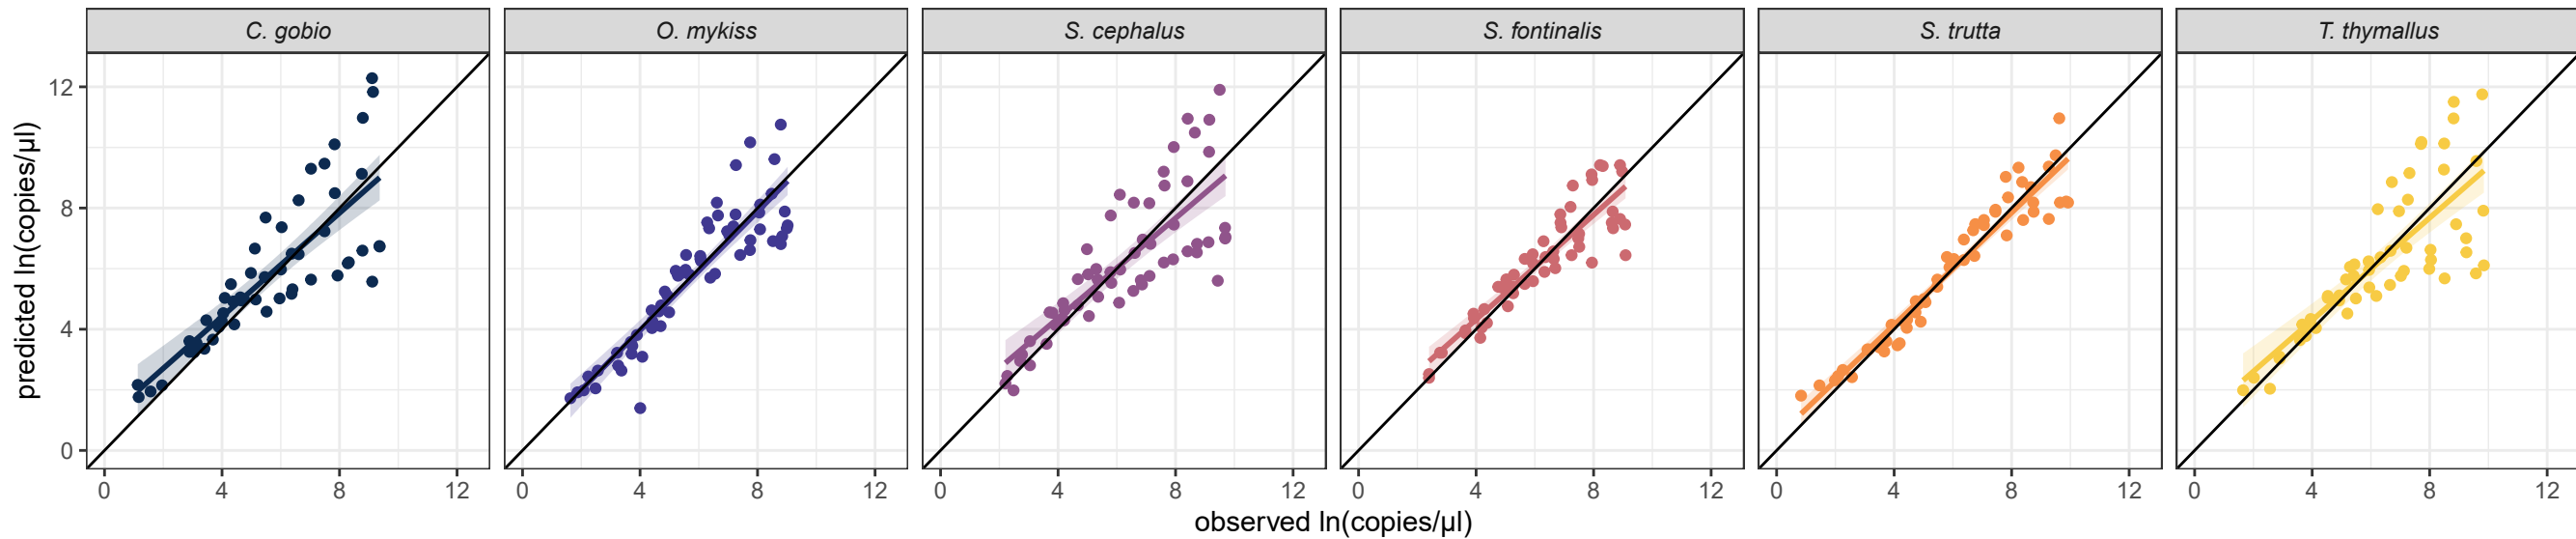

predicted from multiplex cePCR

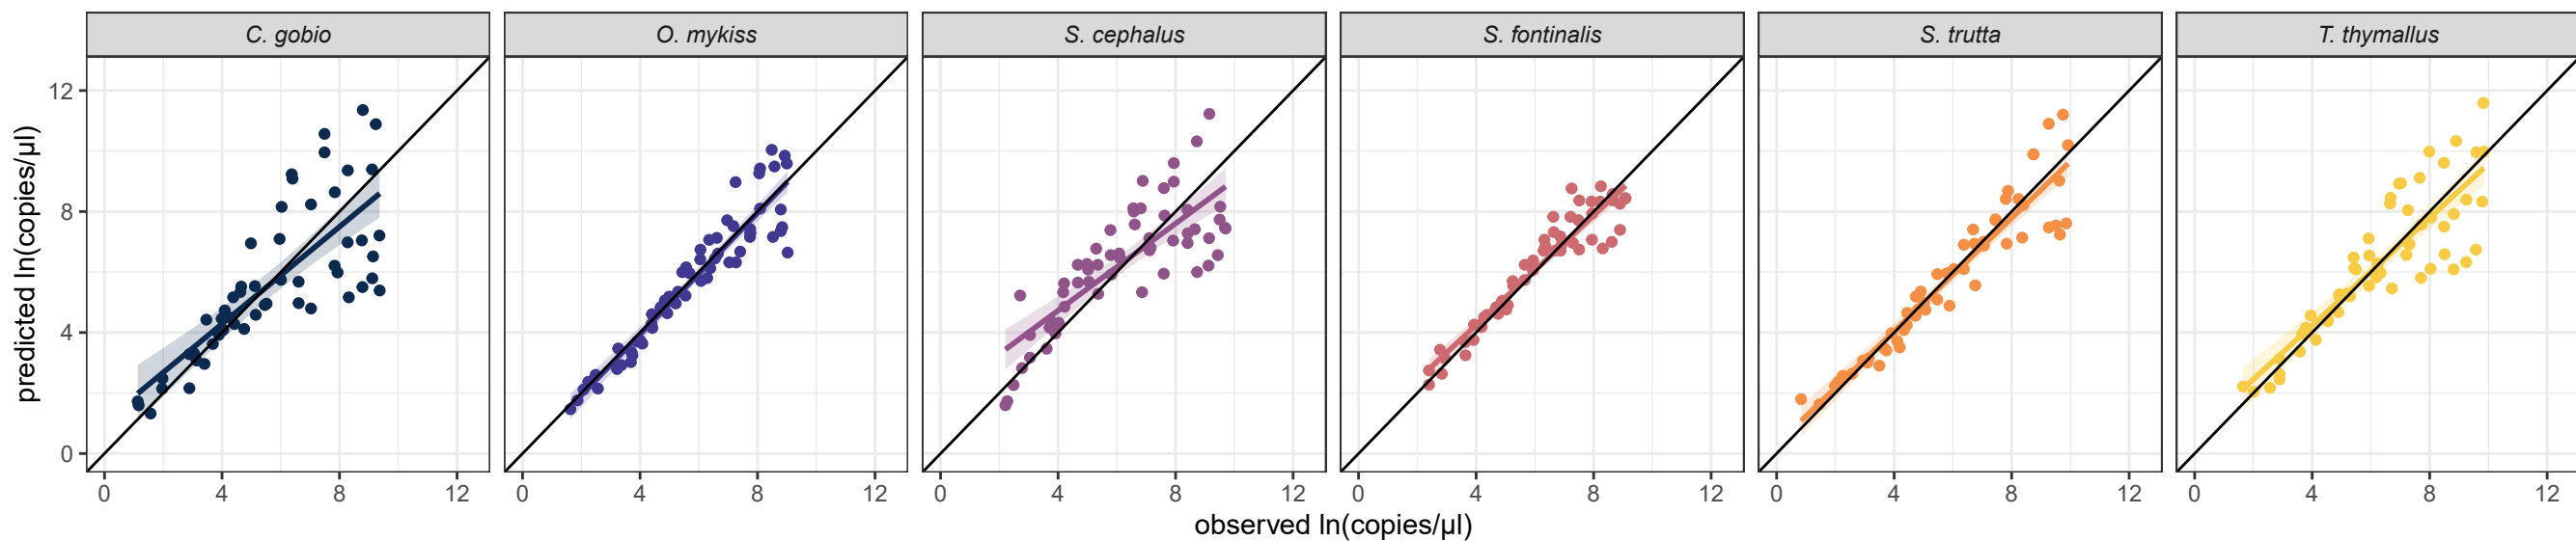

Figure 5

field samples: copies vs. RFU

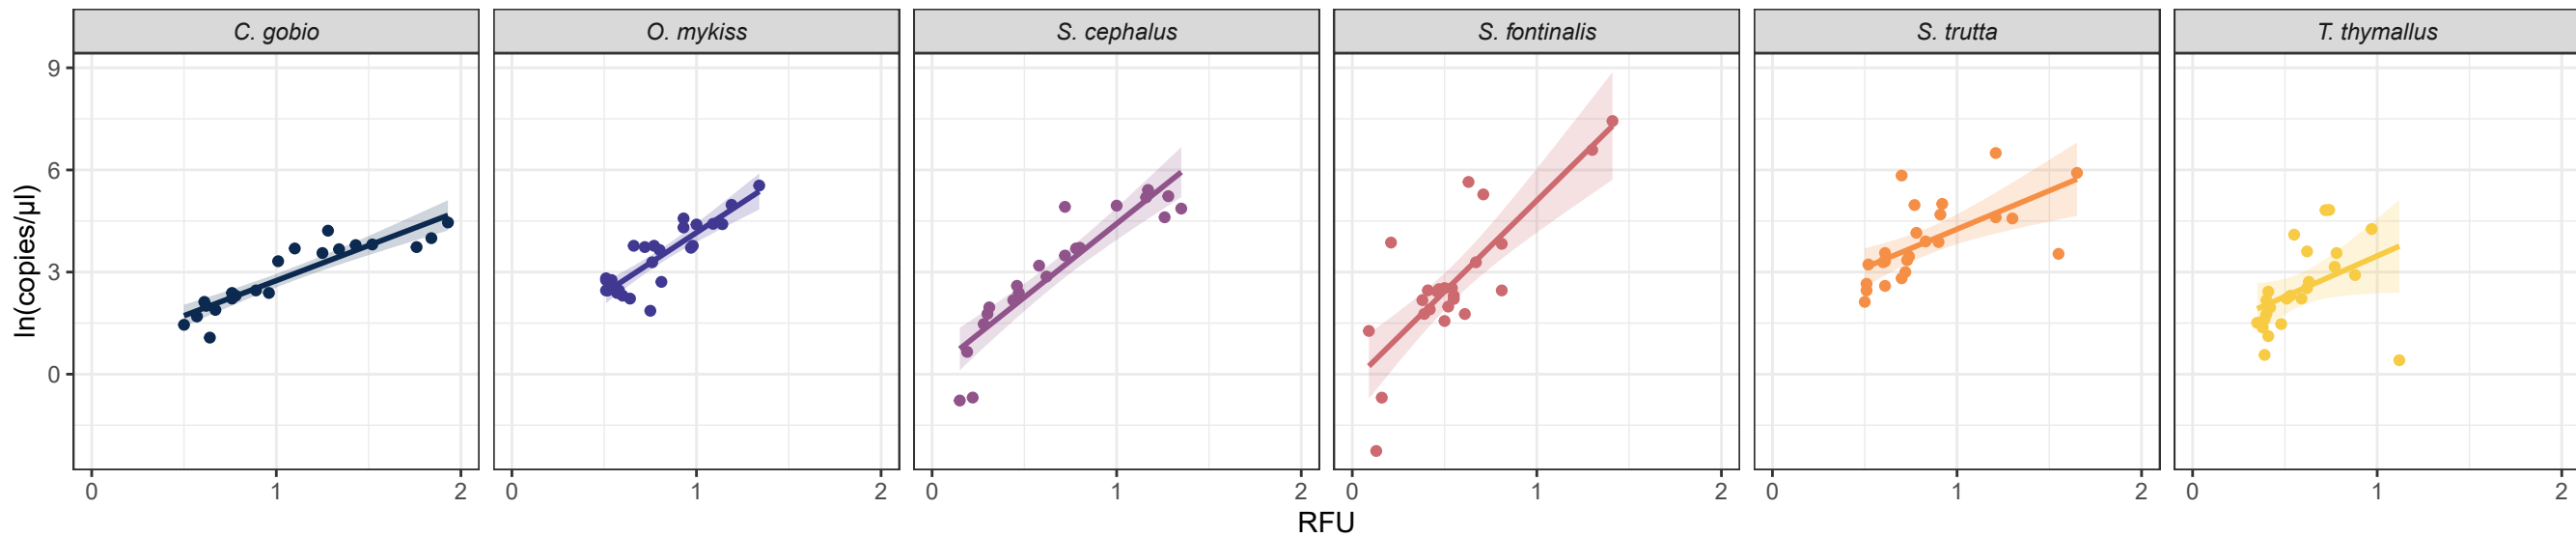

field samples: predicted vs. observed target copies

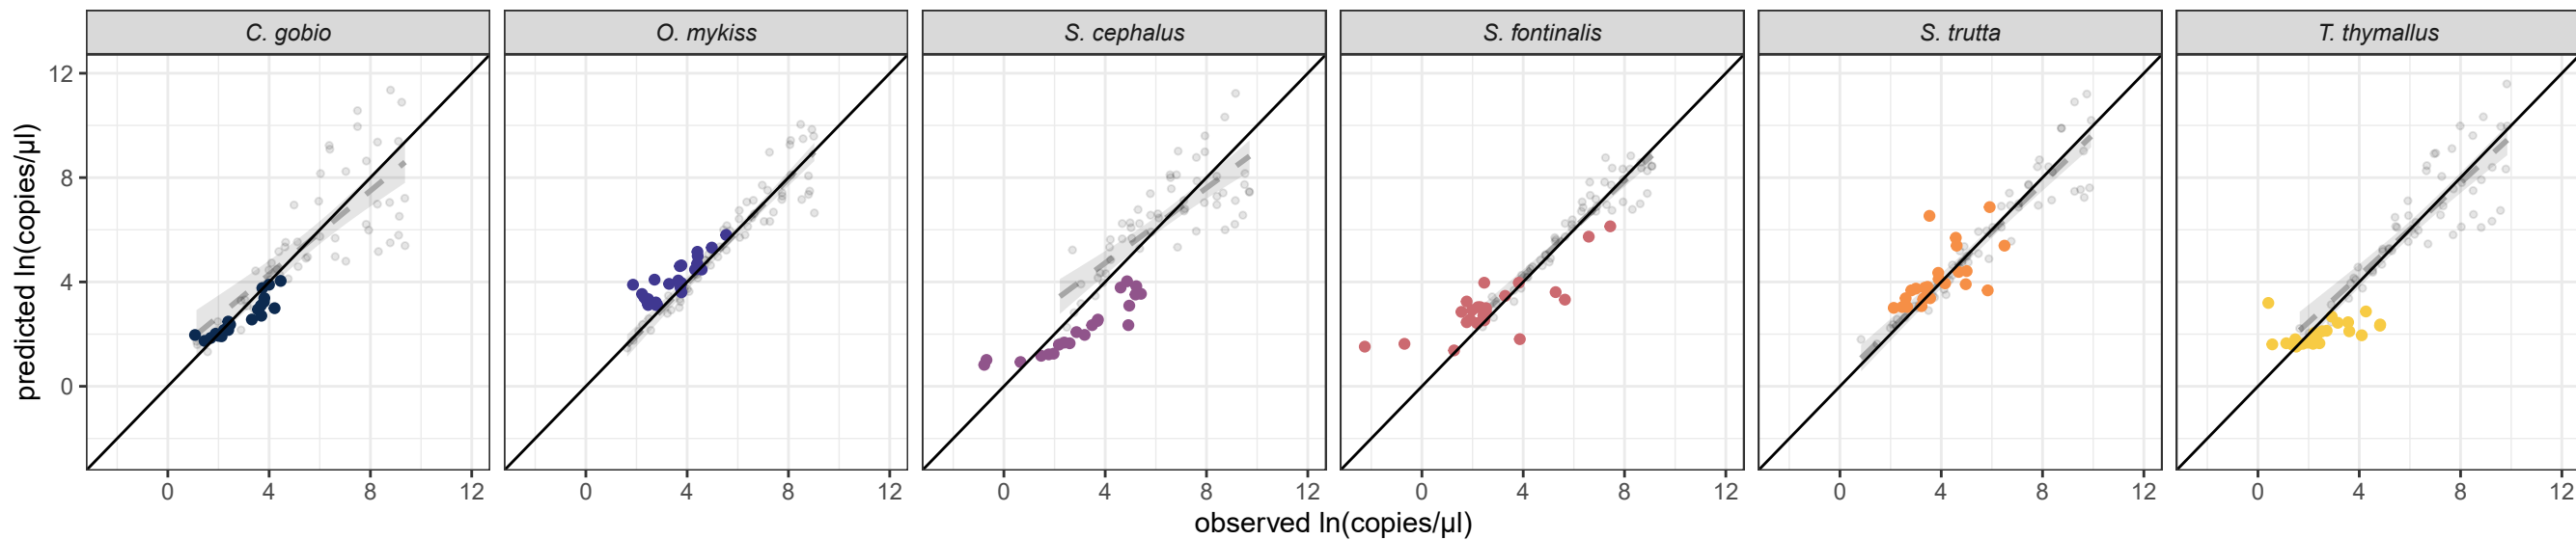

Source: http://biorxiv.org/content/10.1101/2020.10.24.353730v1.full.pdf
